# Supplementary material for: Detecting overlapping coding sequences in virus genomes
Source: Springer Nature journal article supplement (doi:10.1186/1471-2105-7-75), 2006-02-16

# AHBV (05-08-14); mean muts per column over tree = 0.40

▲ stops in null model     
 ▲ stops in alternate model     
 ■ gaps

sequence divergence  
 v. reference (mean #  
 pairs (mut per nt)

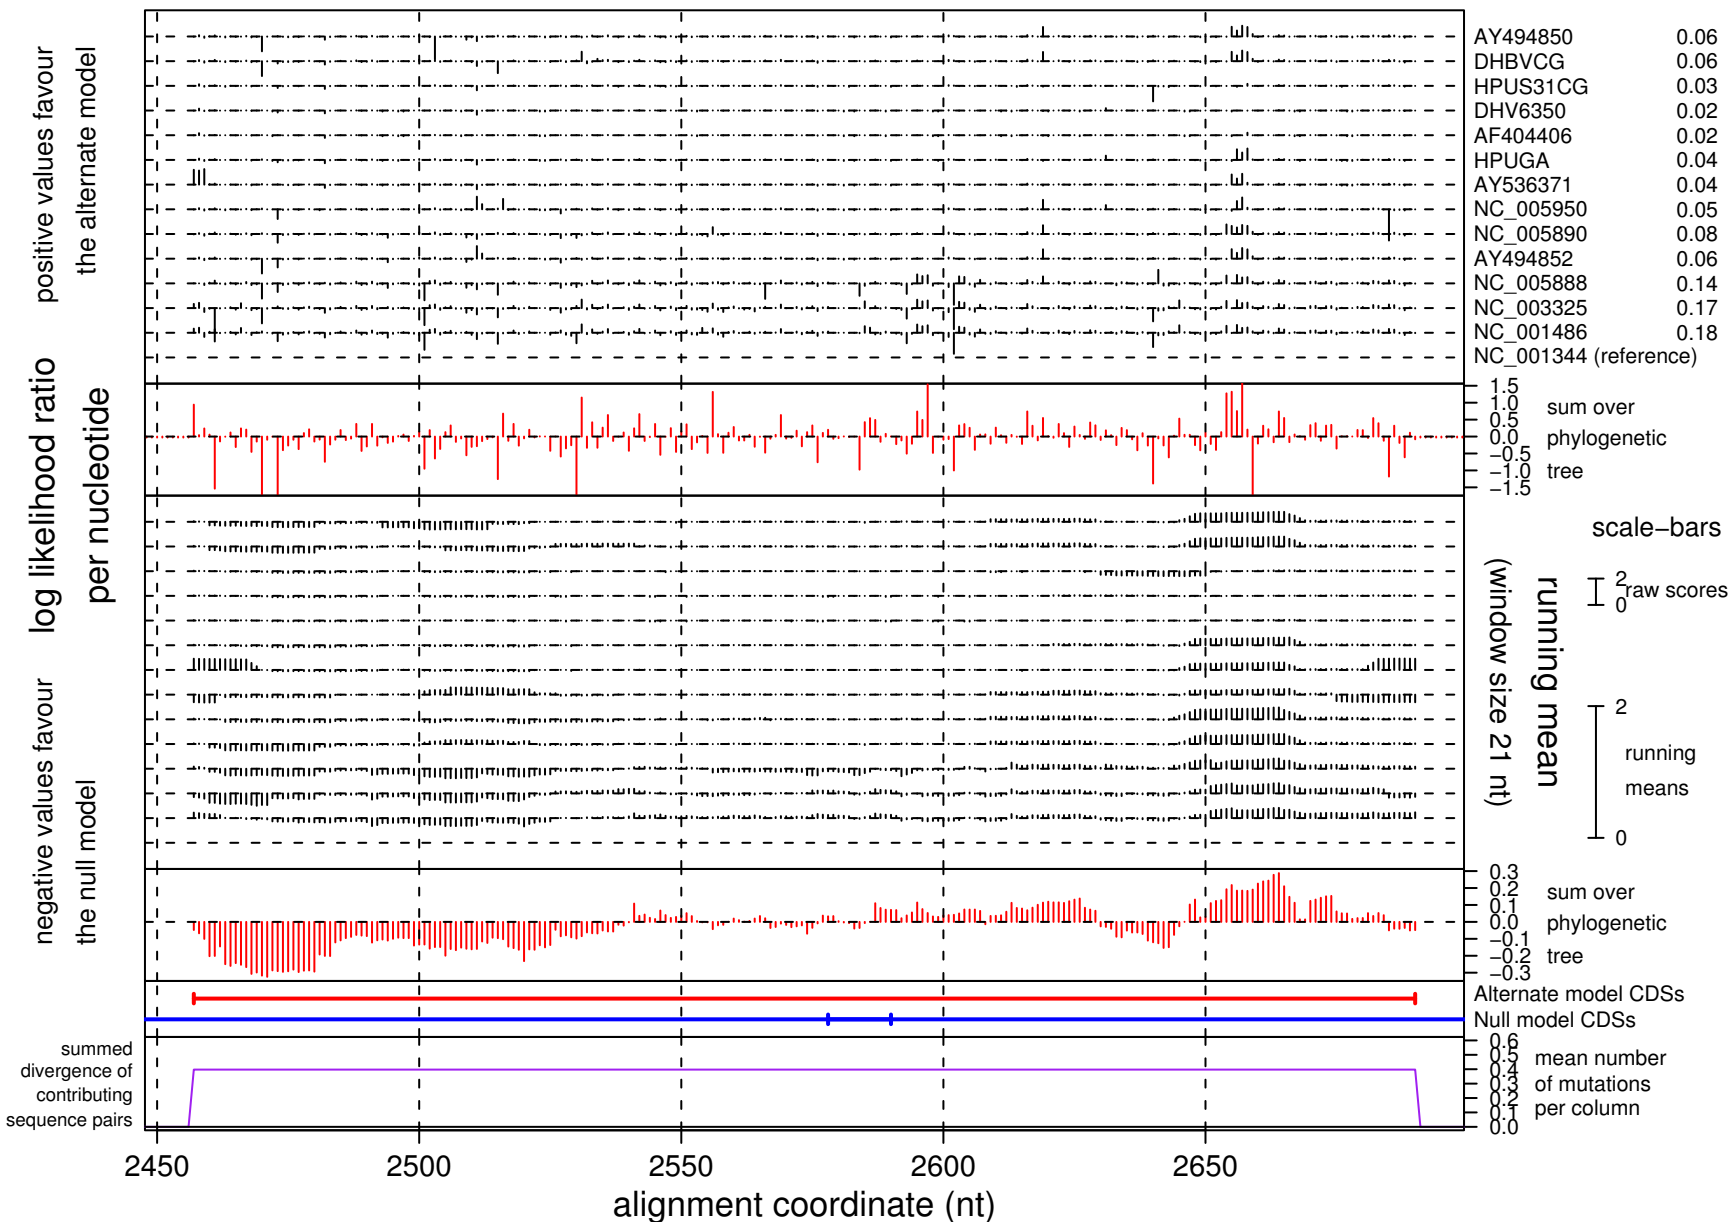

Supplement: 12859_2005_814_MOESM16_ESM.pdf [file 12859_2005_814_MOESM16_ESM.pdf]
